# Supplementary material for: The effects of housing density on mouse thermal physiology depend on sex and ambient temperature
Source: PubMed Central journal article supplement (PMC8463779; doi:10.1016/j.molmet.2021.101332), 2021-09-01
Supplement: mmc1.pdf [file mmc1.pdf]

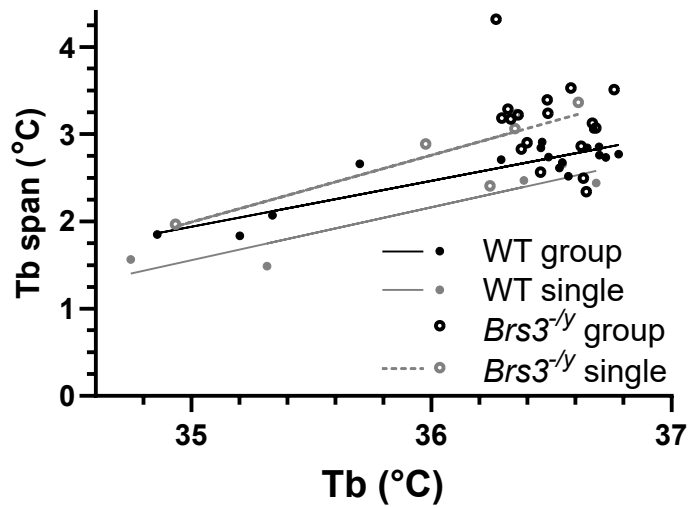

**Figure S1:** Tb span dependence on Tb. Using 24-hour measurement periods, the Tb span (the 95<sup>th</sup> percentile minus the 5<sup>th</sup> percentile) and 24-h mean Tb were analyzed by linear regression in the indicated groups of male mice at 23 °C. The regression lines are: WT group,  $Tb\ span = 0.5271 * Tb - 16.51$ ,  $R^2 = 0.80$ ; WT single,  $Tb\ span = 0.6048 * Tb - 19.61$ ,  $R^2 = 0.88$ ; *Brs3*<sup>-/-</sup> group,  $R^2 < 0.1$ , and *Brs3*<sup>-/-</sup> single,  $Tb\ span = 0.7672 * Tb - 24.86$ ,  $R^2 = 0.74$ . The regression line slopes are different from zero at  $P < 0.0001$ ,  $P = 0.018$ ,  $P = 0.22$ , and  $P = 0.028$ , respectively.

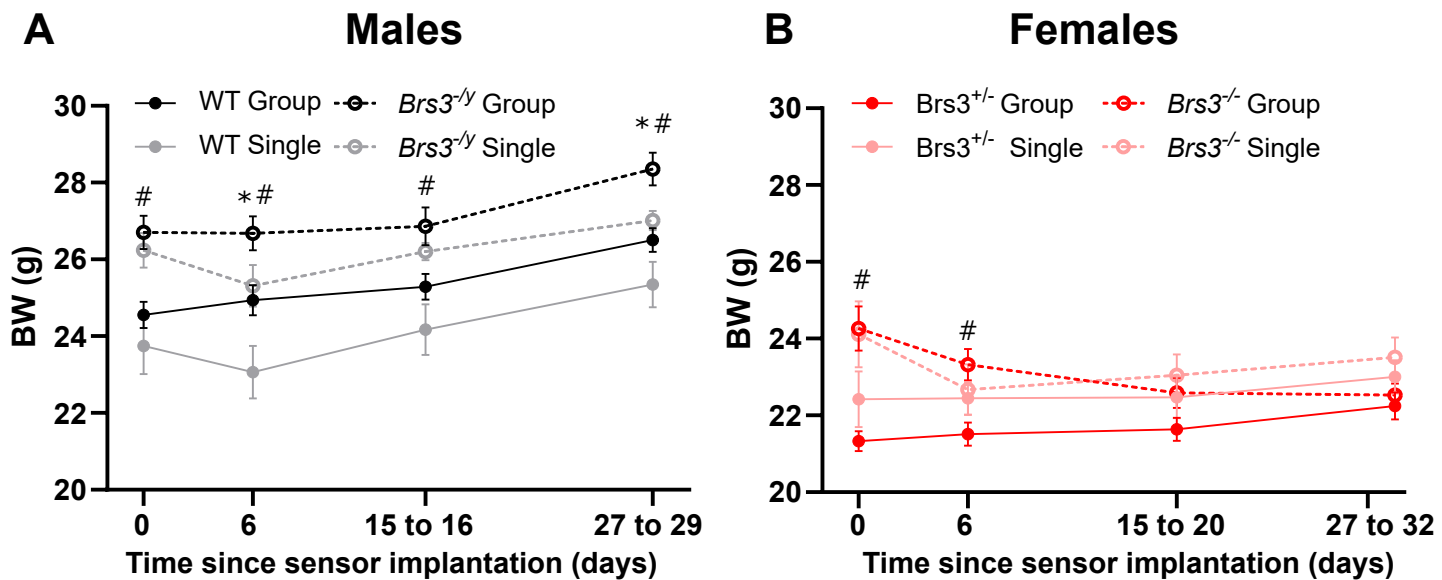

**Figure S2:** Body weights during study. Body weights were measured on the indicated day after telemeter implantation in (A) male mice implanted at 10 weeks and (B) female mice implanted at 15 weeks of age. 2-way ANOVA: \*  $P < 0.05$  effect of housing, #  $P < 0.05$  effect of genotype,  $n = 5 - 18/\text{group}$ .

# Housing

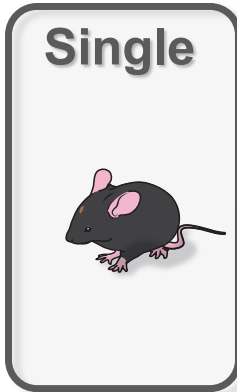

Single

VS

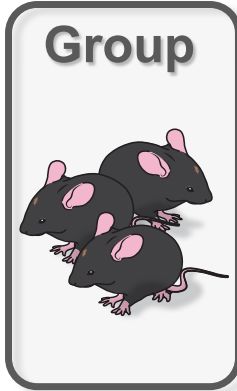

Group

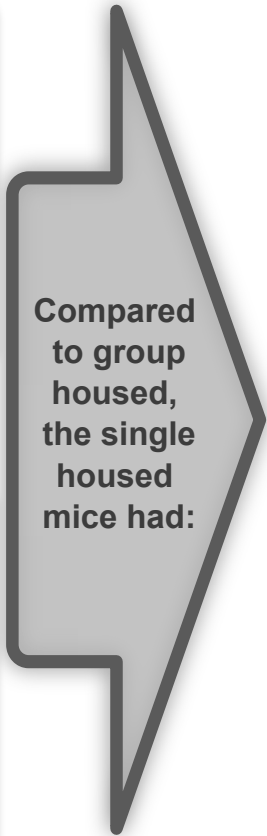

Compared to group housed, the single housed mice had:

|                                      |                         | ♂    | ♀    |
|--------------------------------------|-------------------------|------|------|
| Below thermoneutrality (8 °C, 23 °C) | Energy expenditure      | ↑    | ↑    |
|                                      | Body temperature        | ↓    | NO Δ |
|                                      | Heat conductance        | ↑    | ↑    |
| Above thermoneutrality (35 °C)       | Energy expenditure      | NO Δ | NO Δ |
|                                      | Body temperature        | ↓    | NO Δ |
|                                      | Heat conductance        | NO Δ | ↑    |
| Fasting (23 °C)                      | Body temperature        | ↓    | ↓    |
|                                      | Torpor episode number   | ↑    | NO Δ |
|                                      | Torpor episode duration | NO Δ | ↑    |

**Figure S3:** Thermal physiology is different in single versus group housed mice, with different strategies used in male and female mice.



Table S1: Summary of measured parameters, continued

|                                                        | Males         |               |           |               |               |         |                |         |                     |          | Females       |               |                |               |               |         |                |         |                     |          |
|--------------------------------------------------------|---------------|---------------|-----------|---------------|---------------|---------|----------------|---------|---------------------|----------|---------------|---------------|----------------|---------------|---------------|---------|----------------|---------|---------------------|----------|
|                                                        | WT group      |               | WT single | WT            | Brs3-/y group |         | Brs3-/y single | Brs3-/y | 2-way ANOVA P value |          | Brs3+/- group |               | Brs3+/- single | Brs3+/-       | Brs3-/- group |         | Brs3-/- single | Brs3-/- | 2-way ANOVA P value |          |
|                                                        |               |               |           | P value*      |               |         |                | P value | housing             | genotype | interaction   |               |                |               | P value       |         |                |         | housing             | genotype |
| <b>35 °C Ambient temperature (Figure 5, continued)</b> |               |               |           |               |               |         |                |         |                     |          |               |               |                |               |               |         |                |         |                     |          |
| Light water intake (ml/h)                              | 0.095 ± 0.008 | 0.334 ± 0.030 | <0.0001   | 0.082 ± 0.005 | 0.299 ± 0.026 | <0.0001 | <0.0001        | 0.25    | 0.60                |          | 0.081 ± 0.027 | 0.317 ± 0.053 | 0.0084         | 0.066 ± 0.020 | 0.324 ± 0.082 | 0.0040  | 0.0001         | 0.94    | 0.83                |          |
| Dark water intake (ml/h)                               | 0.099 ± 0.025 | 0.135 ± 0.014 | 0.29      | 0.068 ± 0.011 | 0.150 ± 0.016 | 0.0067  | 0.0029         | 0.64    | 0.20                |          | 0.084 ± 0.019 | 0.204 ± 0.032 | 0.0122         | 0.098 ± 0.014 | 0.235 ± 0.039 | 0.0045  | 0.0002         | 0.43    | 0.76                |          |
| 24 h water intake (ml/h)                               | 0.097 ± 0.015 | 0.216 ± 0.012 | <0.0001   | 0.074 ± 0.007 | 0.198 ± 0.015 | <0.0001 | <0.0001        | 0.13    | 0.83                |          | 0.083 ± 0.006 | 0.244 ± 0.012 | <0.0001        | 0.083 ± 0.009 | 0.200 ± 0.022 | <0.0001 | <0.0001        | 0.12    | 0.11                |          |
| Light PA (counts/min)                                  | 57 ± 4        | 55 ± 6        | 0.95      | 56 ± 3        | 60 ± 5        | 0.85    | 0.88           | 0.74    | 0.57                |          | 27 ± 3        | 29 ± 3        | 0.94           | 29 ± 4        | 34 ± 5        | 0.66    | 0.43           | 0.37    | 0.71                |          |
| Dark PA (counts/min)                                   | 52 ± 3        | 65 ± 9        | 0.34      | 66 ± 2        | 72 ± 9        | 0.80    | 0.18           | 0.14    | 0.60                |          | 45 ± 3        | 53 ± 6        | 0.38           | 54 ± 3        | 68 ± 5        | 0.07    | 0.0200         | 0.0180  | 0.49                |          |
| 24 h PA (counts/min)                                   | 54 ± 3        | 60 ± 8        | 0.68      | 61 ± 2        | 66 ± 6        | 0.78    | 0.32           | 0.24    | 0.91                |          | 37 ± 2        | 42 ± 5        | 0.47           | 43 ± 3        | 52 ± 3        | 0.09    | 0.0308         | 0.0248  | 0.48                |          |
| <b>Fasting, CLAMS (Figure 6)</b>                       |               |               |           |               |               |         |                |         |                     |          |               |               |                |               |               |         |                |         |                     |          |
| Mean Tb (°C)                                           | 35.65 ± 0.11  | 35.27 ± 0.30  | 0.19      | 35.62 ± 0.06  | 35.24 ± 0.24  | 0.16    | 0.02           | 0.84    | 0.99                |          | 35.73 ± 0.09  | 35.47 ± 0.21  | 0.37           | 35.93 ± 0.08  | 35.14 ± 0.27  | 0.0007  | 0.0007         | 0.67    | 0.07                |          |
| Minimum Tb (°C)                                        | 33.38 ± 0.16  | 32.38 ± 0.23  | 0.0037    | 33.05 ± 0.10  | 31.26 ± 0.37  | <0.0001 | <0.0001        | 0.0011  | 0.06                |          | 33.05 ± 0.16  | 30.77 ± 0.64  | <0.0001        | 32.67 ± 0.15  | 30.41 ± 0.50  | <0.0001 | <0.0001        | 0.22    | 0.97                |          |
| Tb span (°C)                                           | 3.46 ± 0.19   | 3.84 ± 0.42   | 0.45      | 3.91 ± 0.09   | 5.45 ± 0.27   | <0.0001 | 0.0001         | <0.0001 | 0.0136              |          | 4.03 ± 0.15   | 6.32 ± 0.66   | <0.0001        | 4.43 ± 0.13   | 6.80 ± 0.46   | <0.0001 | <0.0001        | 0.13    | 0.88                |          |
| Tb < 34 °C (% of time)                                 | 7.8 ± 1.6     | 17.9 ± 3.5    | 0.0118    | 10.6 ± 1.4    | 21.7 ± 3.8    | 0.0027  | <0.0001        | 0.17    | 0.82                |          | 11.6 ± 1.8    | 19.7 ± 3.2    | 0.05           | 11.5 ± 1.5    | 25.1 ± 3.8    | 0.0007  | <0.0001        | 0.30    | 0.27                |          |
| Torpor episodes (number)                               | 1.9 ± 0.3     | 4.6 ± 0.7     | 0.0005    | 2.9 ± 0.2     | 4.5 ± 0.7     | 0.0366  | <0.0001        | 0.31    | 0.22                |          | 2.7 ± 0.3     | 3.0 ± 0.5     | 0.88           | 2.9 ± 0.3     | 2.7 ± 0.6     | 0.92    | 0.95           | 0.85    | 0.57                |          |
| Torpor episode duration (min)                          | 53.5 ± 9.0    | 49.8 ± 7.2    | 0.87      | 47.4 ± 5.9    | 57.3 ± 4.9    | 0.70    | 0.87           | 0.92    | 0.39                |          | 44.5 ± 5.9    | 70.1 ± 13.2   | 0.25           | 51.6 ± 8.5    | 108.3 ± 24.3  | 0.0032  | 0.0012         | 0.06    | 0.20                |          |
| Longest torpor episode (min)                           | 83.4 ± 0.0    | 102.1 ± 0.0   | 0.70      | 73.2 ± 0.0    | 126.6 ± 0.0   | 0.05    | 0.0397         | 0.68    | 0.31                |          | 77.1 ± 11.6   | 132.0 ± 38.2  | 0.06           | 76.6 ± 9.8    | 145.8 ± 13.1  | 0.0143  | 0.0009         | 0.70    | 0.68                |          |
| Conductance (kcal/h/Δ°C)                               | 0.025 ± 0.001 | 0.028 ± 0.002 | 0.18      | 0.026 ± 0.001 | 0.031 ± 0.002 | 0.0123  | 0.0025         | 0.17    | 0.48                |          | 0.024 ± 0.000 | 0.031 ± 0.002 | <0.0001        | 0.025 ± 0.000 | 0.030 ± 0.000 | <0.0001 | <0.0001        | 0.28    | 0.06                |          |
| Mean TEE (kcal/h)                                      | 0.308 ± 0.010 | 0.353 ± 0.017 | 0.22      | 0.331 ± 0.015 | 0.374 ± 0.030 | 0.25    | 0.0355         | 0.27    | 0.95                |          | 0.286 ± 0.006 | 0.370 ± 0.020 | 0.0003         | 0.315 ± 0.006 | 0.365 ± 0.012 | 0.0217  | <0.0001        | 0.35    | 0.19                |          |
| Minimum TEE (kcal/h)                                   | 0.145 ± 0.008 | 0.125 ± 0.007 | 0.30      | 0.147 ± 0.006 | 0.125 ± 0.016 | 0.24    | 0.0438         | 0.93    | 0.92                |          | 0.121 ± 0.005 | 0.113 ± 0.009 | 0.74           | 0.117 ± 0.007 | 0.111 ± 0.010 | 0.85    | 0.40           | 0.72    | 0.89                |          |
| Mean RER                                               | 0.741 ± 0.006 | 0.701 ± 0.010 | 0.0008    | 0.739 ± 0.003 | 0.694 ± 0.006 | 0.0002  | <0.0001        | 0.53    | 0.68                |          | 0.744 ± 0.005 | 0.729 ± 0.012 | 0.39           | 0.751 ± 0.005 | 0.728 ± 0.009 | 0.12    | 0.0319         | 0.76    | 0.62                |          |
| Mean PA (counts/min)                                   | 76 ± 9        | 156 ± 13      | 0.0025    | 69 ± 4        | 169 ± 25      | 0.0003  | <0.0001        | 0.87    | 0.50                |          | 77 ± 7        | 178 ± 33      | 0.0021         | 94 ± 5        | 176 ± 15      | 0.0114  | <0.0001        | 0.70    | 0.61                |          |
| 24 h water intake (ml/h)                               | 0.057 ± 0.010 | 0.087 ± 0.012 | 0.25      | 0.051 ± 0.014 | 0.092 ± 0.018 | 0.10    | 0.0190         | 0.99    | 0.72                |          | 0.066 ± 0.012 | 0.102 ± 0.021 | 0.37           | 0.096 ± 0.024 | 0.139 ± 0.018 | 0.25    | 0.06           | 0.10    | 0.86                |          |
| <b>Fasting, telemetry (section 3.5)</b>                |               |               |           |               |               |         |                |         |                     |          |               |               |                |               |               |         |                |         |                     |          |
| Mean Tb (°C)                                           | 35.52 ± 0.12  | 35.29 ± 0.32  | 0.62      | 35.52 ± 0.09  | 34.76 ± 0.29  | 0.0057  | 0.0076         | 0.14    | 0.14                |          | 35.11 ± 0.15  | 35.60 ± 0.14  | 0.08           | 35.45 ± 0.10  | 35.09 ± 0.13  | 0.25    | 0.69           | 0.59    | 0.0137              |          |
| Minimum Tb (°C)                                        | 32.39 ± 0.16  | 32.57 ± 0.53  | 0.89      | 32.45 ± 0.11  | 30.03 ± 0.61  | <0.0001 | 0.0003         | <0.0001 | <0.0001             |          | 30.31 ± 0.40  | 29.84 ± 0.52  | 0.71           | 31.40 ± 0.20  | 29.25 ± 0.56  | 0.0026  | 0.0049         | 0.57    | 0.06                |          |
| Tb span (°C)                                           | 4.59 ± 0.20   | 3.53 ± 0.41   | 0.05      | 4.94 ± 0.13   | 6.47 ± 0.72   | 0.0021  | 0.48           | <0.0001 | 0.0002              |          | 6.61 ± 0.43   | 6.74 ± 0.50   | 0.97           | 5.48 ± 0.17   | 7.84 ± 0.56   | 0.0014  | 0.0092         | 0.98    | 0.0188              |          |
| Tb < 34 °C (% of time)                                 | 15.9 ± 1.4    | 14.3 ± 4.4    | 0.89      | 19.3 ± 1.9    | 31.9 ± 3.7    | 0.0018  | 0.0395         | 0.0002  | 0.0085              |          | 24.2 ± 2.1    | 19.6 ± 2.7    | 0.35           | 21.6 ± 1.6    | 23.1 ± 0.9    | 0.89    | 0.53           | 0.84    | 0.22                |          |
| Torpor episodes (number)                               | 3.9 ± 0.4     | 3.0 ± 0.5     | 0.39      | 3.4 ± 0.2     | 5.2 ± 0.7     | 0.0217  | 0.37           | 0.09    | 0.0092              |          | 3.1 ± 0.2     | 2.8 ± 0.5     | 0.88           | 3.7 ± 0.4     | 3.7 ± 0.6     | 0.99    | 0.70           | 0.11    | 0.80                |          |
| Torpor episode duration (min)                          | 57.7 ± 5.0    | 54.7 ± 12.9   | 0.98      | 81.1 ± 10.1   | 84.8 ± 13.7   | 0.97    | 0.99           | 0.0241  | 0.77                |          | 97.9 ± 7.5    | 89.1 ± 16.4   | 0.8111         | 84.6 ± 6.3    | 85.9 ± 16.3   | 0.99    | 0.73           | 0.44    | 0.64                |          |
| Longest torpor episode (min)                           | 113.8 ± 7.3   | 78.4 ± 18.9   | 0.63      | 144.9 ± 13.0  | 245.9 ± 81.4  | 0.0232  | 0.25           | 0.0010  | 0.0194              |          | 164.6 ± 17.6  | 129.6 ± 10.2  | 0.36           | 147.1 ± 10.9  | 154.1 ± 18.6  | 0.96    | 0.47           | 0.86    | 0.28                |          |

\*adjusted P value from post hoc Sidák's test for group vs single housing.

Abbreviations:

Tb, core body temperature

TEE, total energy expenditure

RER, respiratory exchange ratio

PA, physical activity

**Table S2. Effect of a range of ambient temperatures on thermal physiology of C57BL/6J mice**

|                                                                     | <b>Males,<br/>single housed</b> | <b>Females,<br/>single housed</b> | <b>Males,<br/>group housed</b> | <b>Females,<br/>group housed</b> |
|---------------------------------------------------------------------|---------------------------------|-----------------------------------|--------------------------------|----------------------------------|
| <b>n of cages</b>                                                   | 6                               | 6                                 | 6                              | 6                                |
| <b>n of data points in regression</b>                               | 3654                            | 4832                              |                                |                                  |
| <b>Body weight (g)</b>                                              | 28.0 ± 0.5                      | 23.6 ± 0.3                        | 29.8 ± 0.5                     | 21.8 ± 0.3                       |
| <b>TEE analysis:</b>                                                |                                 |                                   |                                |                                  |
| <b>TEE Slope, &lt;Tl<sub>C<sub>EE</sub></sub> (kcal/h/°C)</b>       | -0.0291 ± 0.0004                | -0.0218 ± 0.0004                  |                                |                                  |
| <b>Tl<sub>C<sub>EE</sub></sub> (TN<sub>PL</sub>, °C)</b>            | 28.45 ± 0.01                    | 30.06 ± 0.19                      |                                |                                  |
| <b>TEE, at Tl<sub>C<sub>EE</sub></sub> (kcal/h)</b>                 | 0.229 ± 0.006                   | 0.204 ± 0.003                     |                                |                                  |
| <b>TEE<sub>R</sub> (°C)</b>                                         | 35.52 ± 0.39                    | 36.63 ± 0.28                      |                                |                                  |
| <b>TEE Slope, &gt;TEE<sub>R</sub> (kcal/h/°C)</b>                   | 0.0350 ± 0.0240                 | 0.0188 ± 0.0033                   |                                |                                  |
| <b>defended Tb (°C)</b>                                             | 36.31 ± 0.24                    | 39.42 ± 0.36                      |                                |                                  |
| <b>Tb analysis:</b>                                                 |                                 |                                   |                                |                                  |
| <b>Tb, &lt;Tb<sub>inc</sub> (°C)</b>                                | 35.59 ± 0.07                    | 36.16 ± 0.13                      |                                |                                  |
| <b>Tb<sub>inc</sub> (°C)</b>                                        | 30.39 ± 0.28                    | 29.10 ± 0.20                      |                                |                                  |
| <b>Tb Slope, &gt;Tb<sub>inc</sub> &lt;Tb<sub>R</sub> (°C Tb/°C)</b> | 0.191 ± 0.026                   | 0.272 ± 0.015                     |                                |                                  |
| <b>Tb<sub>R</sub> (°C)</b>                                          | 33.94 ± 0.08                    | 34.65 ± 0.14                      |                                |                                  |
| <b>Tb Slope, &gt;Tb<sub>R</sub> (°C Tb/°C)</b>                      | 0.967 ± 0.030                   | 0.649 ± 0.014                     |                                |                                  |
| <b>Conductance analysis:</b>                                        |                                 |                                   |                                |                                  |
| <b>n of data points in regression</b>                               | 658                             | 651                               | 665                            | 680                              |
| <b>Conductance slope, Ta&lt;27°C (cal/h/°C/°C)</b>                  | 0.013 ± 0.081                   | 0.246 ± 0.063                     | 0.838 ± 0.087                  | 0.758 ± 0.076                    |

**Key to parameters:**

|                                                          |                                                                                              |
|----------------------------------------------------------|----------------------------------------------------------------------------------------------|
| TEE Slope, <Tl <sub>C<sub>EE</sub></sub> (kcal/h/°C)     | TEE vs. Ta slope for Ta <Tl <sub>C<sub>EE</sub></sub>                                        |
| Tl <sub>C<sub>EE</sub></sub> (TN <sub>PL</sub> , °C)     | lower critical temperature, the (first) breakpoint of the TEE vs. Ta graph; TN <sub>PL</sub> |
| TEE, at Tl <sub>C<sub>EE</sub></sub> (kcal/h)            | mean TEE at Ta = Tl <sub>C<sub>EE</sub></sub>                                                |
| TEE <sub>R</sub> (°C)                                    | breakpoint of the TEE vs. Ta graph, where TEE starts to rise with Ta; TN <sub>PD</sub>       |
| TEE Slope, >TEE <sub>R</sub> (kcal/h/°C)                 | TEE vs. Ta slope for Ta >TEE <sub>R</sub>                                                    |
| defended Tb (°C)                                         | defended Tb, X intercept of TEE vs. Ta line (using only Ta <Tl <sub>C<sub>EE</sub></sub> )   |
| Tb, <Tb <sub>inc</sub> (°C)                              | mean Tb at Ta < Tb <sub>inc</sub>                                                            |
| Tb <sub>inc</sub> (°C)                                   | Ta above which the Tb first increases; TN <sub>PL</sub>                                      |
| Tb Slope, >Tb <sub>inc</sub> <Tb <sub>R</sub> (°C Tb/°C) | Tb slope in the region >Tb <sub>inc</sub> and <Tb <sub>R</sub>                               |
| Tb <sub>R</sub> (°C)                                     | second breakpoint of Tb vs. Ta graph, where Tb starts to rise steeply; TN <sub>PD</sub>      |
| Tb Slope, >Tb <sub>R</sub> (°C Tb/°C)                    | Tb vs. Ta slope for Ta >Tb <sub>R</sub>                                                      |
| Conductance slope, Ta<27°C                               | Heat conductance vs. Ta slope for Ta<27°C                                                    |

TEE and Tb parameters were determined by mixed model segmented linear regression [6]. The TEE model has three segments with the slope of the middle one fixed at zero. The Tb model has three segments with the slope of the first one fixed at zero. In both models, the two breakpoints and other two slopes are determined by the model. Conductance slope was obtained by linear regression. Data are means ± SE.

Table S3: Summary of adipose tissue weight, *UCP1* mRNA expression, and hormone levels

|                       | Males             |                   |                       |                   |                   |                            |             |         |          | Females           |                   |                            |                   |                   |                            |             |      |         |
|-----------------------|-------------------|-------------------|-----------------------|-------------------|-------------------|----------------------------|-------------|---------|----------|-------------------|-------------------|----------------------------|-------------------|-------------------|----------------------------|-------------|------|---------|
|                       | WT group          | WT single         | WT<br><i>P</i> value* | Brs3-/y group     | Brs3-/y single    | Brs3-/y<br><i>P</i> value* | 2 way ANOVA |         |          | Brs3+/- group     | Brs3+/- single    | Brs3+/-<br><i>P</i> value* | Brs3-/- group     | Brs3-/- single    | Brs3-/-<br><i>P</i> value* | 2 way ANOVA |      |         |
|                       |                   |                   |                       |                   |                   |                            |             | housing | genotype | interaction       |                   |                            |                   |                   |                            |             |      | housing |
| BAT weight (mg)       | 97.2 ± 4.8        | 81.9 ± 5.5        | 0.89                  | 118.7 ± 6.5       | 114.2 ± 2.8       | 0.26                       | 0.18        | 0.0005  | 0.46     | 74.9 ± 3.4        | 88.1 ± 5.3        | 0.52                       | 83.1 ± 5.5        | 91.9 ± 5.4        | 0.24                       | 0.075       | 0.33 | 0.72    |
| iWAT weight (g)       | 0.289 ± 0.013     | 0.288 ± 0.022     | 0.62                  | 0.334 ± 0.016     | 0.360 ± 0.032     | 1.00                       | 0.56        | 0.0071  | 0.52     | 0.304 ± 0.015     | 0.316 ± 0.009     | 0.25                       | 0.382 ± 0.038     | 0.302 ± 0.027     | 0.97                       | 0.36        | 0.39 | 0.22    |
| eWAT weight (g)       | 0.270 ± 0.012     | 0.267 ± 0.013     | 0.52                  | 0.338 ± 0.015     | 0.311 ± 0.019     | 0.99                       | 0.42        | 0.0031  | 0.52     | 0.204 ± 0.009     | 0.212 ± 0.020     | 0.70                       | 0.292 ± 0.039     | 0.253 ± 0.023     | 0.98                       | 0.67        | 0.09 | 0.52    |
| BAT <i>Ucp1</i> mRNA  | 1.00 ± 0.19       | 1.75 ± 0.20       | 0.54                  | 0.28 ± 0.04       | 0.49 ± 0.09       | 0.0035                     | 0.0039      | <0.0001 | 0.08     | 0.65 ± 0.07       | 0.97 ± 0.07       | 0.37                       | 0.77 ± 0.15       | 0.95 ± 0.06       | 0.058                      | 0.018       | 0.62 | 0.47    |
| iWAT <i>Ucp1</i> mRNA | 0.00245 ± 0.00116 | 0.00188 ± 0.00122 | 0.67                  | 0.00064 ± 0.00034 | 0.00174 ± 0.00085 | 0.90                       | 0.78        | 0.32    | 0.40     | 0.00050 ± 0.00023 | 0.00228 ± 0.00151 | 0.43                       | 0.00016 ± 0.00005 | 0.00016 ± 0.00001 | 0.40                       | 0.10        | 0.71 | 0.97    |
| Serum T3 (ng/ml)      | 1.35 ± 0.06       | 1.54 ± 0.10       | 0.018                 | 1.42 ± 0.07       | 1.11 ± 0.05       | 0.17                       | 0.47        | 0.028   | 0.0030   | 0.80 ± 0.08       | 0.70 ± 0.09       | 0.085                      | 0.96 ± 0.08       | 0.42 ± 0.08       | 0.98                       | 0.11        | 0.91 | 0.19    |
| Serum T4 (µg/dl)      | 4.67 ± 0.11       | 4.84 ± 0.14       | 0.920                 | 4.64 ± 0.20       | 4.54 ± 0.18       | 0.79                       | 0.87        | 0.388   | 0.4961   | 4.67 ± 0.23       | 4.57 ± 0.32       | 0.001                      | 5.19 ± 0.30       | 4.13 ± 0.55       | 0.71                       | 0.00        | 0.55 | 0.03    |
| Serum leptin (ng/ml)  | 2.22 ± 0.20       | 1.19 ± 0.15       | 0.460                 | 3.21 ± 0.29       | 2.70 ± 0.36       | 0.05                       | 0.02        | 0.000   | 0.4238   | 2.58 ± 0.35       | 1.19 ± 0.15       | 0.756                      | 3.87 ± 0.61       | 3.26 ± 0.40       | 0.98                       | 0.54        | 0.10 | 0.74    |

\* *P* value from post hoc Šidák multiple comparison test for group vs single housing
